# Supplementary material
Source: publisher figshare collection journal article supplement (https://gsajournals.figshare.com/ndownloader/files/13989521)
Supplement: Supplementary file 1 [file 13989521]

## Sheet: miRNA KO mutants tested
	miRNA	Courtship Latency	Mating Latency	Mating Success	Courtship Index (if measured)	Comments
1	miR-306-79-9b	N.S.N=23	N.S.N=24	Lower mating success, N=41, p=0.005243
2	miR-9c	N.S.N=25	N.S.N=27	N.S.N=40
3	miR-10	N.S.N=29	N.S.N=29	N.S.N=39
4	miR-11	N.S.N=29	N.S.N=27	N.S.N=40
5	miR-124	Decreased courtship latency, N=25, p<0.0001	N.S.N=25	N.S.N=44
6	miR-133	N.S.N=29	N.S.N=29	N.S.N=42
7	miR-137	N.S.N=29	N.S.N=29	N.S.N=48
8	miR-184	N.S.N=30	N.S.N=30	N.S.N=50
9	miR-193	N.S.N=27	N.S.N=27	N.S.N=40
10	miR-219	N.S.N=23	N.S.N=23	Lower mating success, N=48, p=0.00106
11	miR-263b	N.S.N=30	N.S.N=27	N.S.N=31	Increased, N=27 p<0.0001
12	miR-274	Decreased courtship latency, N=24, p<0.0001	N.S.N=30	N.S.N=41
13	miR-276b	Less than 20 mated flies	Less than 20 mated flies	Lower mating success, N=36, p=0.000001
14	miR-278	Increased , N=32, p=0.014	N.S.N=36	N.S.N=59	N.S.N=32
15	miR-282	N.S.N=25	N.S.N=27	Lower mating success, N=43, p=0.027509
16	miR-283	N.S.N=29	N.S.N=31	N.S.N=42
17	miR-285	N.S.N=29	N.S.N=37	Higher mating success, N=41 p=0.0105
18	miR-2a-2-2a-1-2b-2	Decreased courtship latency, N=26, p<0.0001	N.S.N=29	Lower mating success, N=50, p=0.026092
19	miR-2b-1	N.S.N=34	N.S.N=34	N.S.N=46
20	miR-2c, miR-13a, miR-13b-1	N.S.N=29	N.S.N=24	N.S.N=38
21	miR-303	Increased courtship latency, N=30	N.S.N=30	N.S.N=42
22	miR-304	N.S.N=29	N.S.N=29	N.S.N=37
23	miR-307a-307b	Decreased courtship latency, N=27, p=0.0222	N.S.N=28	Lower mating success, N=45, p=0.012463
24	miR-310-311-312-313	N.S.N=27	Increased mating latency, N=27,p=0.0143	Lower mating success, N=70, p=0.000001
25	miR-316	Decreased courtship latency, N=23, p<0.0001	N.S.N=23	Lower mating success, N=64, p=0.000001
26	miR-317	N.S.N=26	Increased mating latency, N=26, p=0.0295	Lower mating success, N=50, p=0.01508
27	miR-318	Decreased courtship latency, N=26, p<0.0001	N.S.N=26	Lower mating success, N=51, p=0.014699
28	miR-31a	Increased courtship latency, N=24,p=0.0368	Increased mating latency, N=24,p=0.0327	Lower mating success, N=66, p=0.000001
29	miR-31b	N.S.N=32	N.S.N=32	N.S.N=45
30	miR-33	N.S.N=26	N.S.N=26	N.S.N=38
31	miR-87	N.S.N=24	N.S.N=24	Lower mating success, N=43, p=0.28444
32	miR-929	Less than 20 mated flies	Less than 20 mated flies	Lower mating success, N=53, p=0.00
33	miR-92a	N.S.N=29	N.S.N=29	N.S.N=37
34	miR-92b	Increased courtship latency, N=27, p=0.0166	N.S.N=27	Lower mating success, N=61, p=0.004183
35	miR-932	Decreased courtship latency, N=22, p=0.0062	N.S.N=23	N.S.N=42
36	miR-955	Decreased courtship latency, N=26, p=0.0381	N.S.N=26	N.S.N=38
37	miR-956	Decreased courtship latency, N=25, p<0.0001	N.S.N=25	Lower mating success, N=47, p=0.010612
38	miR-957	N.S.N=29	N.S.N=29	N.S.N=38	N.S.N=27	Male-male courtship observed
39	miR-958	N.S.N=29	N.S.N=29	N.S.N=38
40	miR-959-960-961-962	N.S.N=27	N.S.N=27	N.S.N=48
41	miR-965	N.S.N=28	N.S.N=28	N.S.N=35
42	miR-966	N.S.N=30	N.S.N=30	N.S.N=42
43	miR-967	Decreased courtship latency, N=26, p<0.0001	N.S.N=26	N.S.N=33
44	miR-970	N.S.N=27	N.S.N=27	N.S.N=34
45	miR-971	Increased courtship latency, N=28	N.S.N=28	N.S.N=40
46	miR-975	N.S.N=29	N.S.N=29	N.S.N=36
47	miR-980	N.S.N=26	N.S.N=26	N.S.N=29
48	miR-984	Increased courtship latency, N=30	N.S.N=30	N.S.N=44
49	miR-986	Increased courtship latency, N=31,p=0.0290	N.S.N=31	N.S.N=54
50	miR-987	N.S.N=26	N.S.N=26	N.S.N=37
51	miR-988	Increased courtship latency, N=25,p=0.0003	N.S.N=28	N.S.N=46
52	miR-989	N.S.N=24	N.S.N=29	N.S.N=51
53	miR-990	N.S.N=25	N.S.N=25	N.S.N=39
54	miR-999	N.S.N=26	N.S.N=26	N.S.N=39
55	miR-1007	Increased , N=29, p=0.0003	N.S.N=29	N.S.N=33
56	miR-1014	N.S.N=29	N.S.N=32	N.S.N=36
57	miR-1017	-	-	No mating, N=20

## Sheet: Assays discontinued
	miRNA	Reason for discontinuing assays
1	miR-284	Homozygotes rare
2	miR-252	Homozygotes rare
3	miR-994	Homozygotes not healthy

## Sheet: No homozygotes present
	miRNA
1	bft
2	let-7-C
3	miR-190
4	miR-193
5	miR-275
6	miR-276a
7	miR-277-34
8	miR-281-1, miR-281-2
9	miR-3, miR-4, miR-5, miR-6-1, miR-6-2, miR-6-3, miR-286, miR-309
10	miR-308
11	miR-963, miR-964
12	miR-968, miR-1002
13	miR-969
14	miR-981
15	miR-995
16	miR-1000
17	miR-1003
18	miR-1006
19	miR-1010
20	miR-1011
